# Supplementary material for: Spatiotemporal dynamics of self-organized branching in pancreas-derived organoids
Source: PubMed Central journal article supplement (PMC9445099; doi:10.1038/s41467-022-32806-y), 2022-09-05
Supplement: 41467_2022_32806_MOESM1_ESM.pdf [file 41467_2022_32806_MOESM1_ESM.pdf]

1                                    Supplementary Materials for

2

3                                    Spatiotemporal dynamics of self-organized branching in pancreas-derived

4                                    organoids

5

6                                    S. Randriamanantsoa, A. Papargyriou, H. C. Maurer, K. Peschke, M. Schuster, G. Zecchin, K. Steiger, R.

7                                    Öllinger, D. Saur,

8                                    C. Scheel, R. Rad, E. Hannezo, M. Reichert\*, A.R. Bausch\*

9                                    These authors contributed equally: S. Randriamanantsoa, A. Papargyriou

10                                   \*Correspondence to: abausch@mytum.de, maximilian.reichert@tum.de

11

12                                   **This PDF file includes:**

13

14                                   Supplementary Note

15                                   Figs. S1 to S7

16                                   Tables S1 to S3

17                                   References

18

19                                   **Other Supplementary Materials for this manuscript include the following:**

20

21                                   Movies S1 to S15

## 23 **Supplementary Note**

### 24 **I. MINIMAL ANALYTICAL MODEL OF BRANCHING ORGANOID GROWTH**

25 We first provide detail for the minimal theoretical model used to understand the branching  
26 structure of pancreatic organoids. We start with the case of a single branch, before moving to  
27 the description, backed by numerical simulations, of entire branched trees.

28

#### 29 **A. *Single branch elongating without branching, nor proliferative feedback***

30 We consider a cylindrical branch with width  $w$  (or radius  $r = w/2$ ) and length  $L$ , made up of  $N$   
31 cells with volume  $V_c$ , so that by volume conservation, branch width and length must be related  
32 by  $\pi L w^2/4 = N V_c$ . We consider that cells divide at a constant rate  $k_d$ , and that the cell at the very  
33 tip exerts a pulling force  $f_0$  on the tube, which tends to elongate it. We denote as  $\zeta$  the friction  
34 coefficient of cells migrating through the matrix.

35 Force balance on the tip cell then reads:

$$36 \quad \zeta L'(t) = f_0 + \sigma_{branch} \quad (S1)$$

37 i.e. the tube can elongate at speed  $v = L'(t)$  either due to active migration at the tip (which  
38 predicts a linear increase at speed  $f_0/\zeta$ ), or due to compressive forces  $\sigma_{branch}$  from the bulk of  
39 the follower cells in the branch which can be dividing. A simple assumption is that those  
40 compressive forces are dependent on the 1D cell density  $\rho(t) = N(t)/L(t)$ , so that  $\sigma_{branch} = \chi\rho(t)$   
41 where  $\chi$  is a compressibility<sup>1</sup>. We now write the evolution of cell numbers in the branch, which  
42 can increase due to proliferation, or decrease due to elongation:

$$N'(t) = L'(t)\rho(t) + L(t)\rho'(t) = k_d N(t) \quad (S2)$$

so that force balance can be re-wrote as

$$\zeta L'(t) = f_0 + \chi e^{kat}/L(t) \quad (\text{S3})$$

43 In this simplified model, there is no feedback on cellular proliferation, so that the cell number  
 44 increases exponentially, as does length  $L(t) \propto e^{kat/2}$  at long time scales ( $L \rightarrow \infty$ ). On the other  
 45 hand, migration force  $f_0$  causes a linear increase, which is thus always negligible compared to  
 46 proliferation at long enough time scales. Moreover, in the early time points, one expects the  
 47 branch to be under tension (because  $f_0 \gg \sigma_{branch}$ , i.e. tips pull more than they are pushed) -  
 48 which is the time at which there could be breakage as observed in the data (see for instance the  
 49 “high branch count” real organoid in Fig. 4h, where some of the cells at the tips occasionally  
 50 transiently detach). In the late time points, proliferation always wins and catches up, so that the  
 51 length increases exponentially, pushed by the back. Note however that even in this simple  
 52 scenario, the cell density also exponentially increases (because  $N(t) \propto e^{kat}$ , so much faster  
 53 than length), which is due to frictional slowing down.

54

### 55 ***B. Single branch elongating without branching, but with proliferative feedback***

56 This is clearly unphysical, and feedback mechanisms on proliferation must be included in the  
 57 theory. Indeed, there is extensive evidence for stress/density feedbacks on proliferation<sup>2-5</sup>,  
 58 which has been proposed as a source of stabilization of tissue growth<sup>6,7</sup>. At linear order, the  
 59 conservation equation for cell numbers with feedback reads:

$$60 \quad N'(t) = L'(t)\rho(t) + L(t)\rho'(t) = k_d N(t)(1 - \alpha\rho(t)) \quad (\text{S4})$$

61 Note that because we have assumed a simple linear relationship between stress and density,  
 62 both enter the feedback in the same way, making this equation quite general<sup>6,7</sup>. This regulates  
 63 density to a well-defined maximal value of  $\rho_0 = 1/\alpha$ . Under this assumption, density will always  
 64 saturate to  $\rho_0$ , while length grows linearly with slope  $L'(t) = (f_0 + \chi\rho_0)/\zeta$ . This means that a  
 65 phase of exponential growth (proliferation-limited) will be succeeded by a phase of linear

66 growth (migration-limited), due to the frictional forces penalizing growth-driven motion (note  
67 that for the limit  $\zeta \rightarrow 0$ , we get back to the results of the first section as expected).

68 Importantly, as long as the maximal proliferative stress  $\chi\rho_0$  is larger than migration forces  $f_0$ ,  
69 the branch will always transition from early tension/low density (where migration forces thin  
70 the branch more than it can be replenished by proliferation), to a state of late compression/high  
71 density (where proliferation catches up).

### 72 **C. *Branching tree growth with constant tip speed and no proliferative feedback***

73 This analysis suggests that growth of a single branch will always converge to a linear regime in  
74 the presence of proliferative feedbacks. However, we haven't considered so far the branching  
75 of one tip into two (rate  $k_b$ ), which drives branching morphogenesis. For tip branching, the total  
76 number of tips grows in time as  $T(t) \propto e^{k_b t}$ , with the total number of branches scaling as  $2T(t)$   
77 (for a symmetrically branching tree). If all tips grow with speed  $v_0$ , this means that the total  
78 length of the tree (equal to the sum of all branches) will scale as

$$79 \quad L(t) = \frac{v_0}{k_b} e^{k_b t} \quad (\text{S5})$$

80 and if cellular proliferation occurs at a constant rate  $k_d$ , the 1D cellular density (or branch radius)  
81 will scale as

$$82 \quad \rho(t) = \frac{k_b}{v_0} e^{(k_d - k_b)t} \quad (\text{S6})$$

83 which now compares two exponential processes, instead of a linear edge growth vs. an  
84 exponential bulk growth. In particular, if  $k_b > k_d$ , branching is too fast relative to cell division,  
85 and cellular density/branch thickness is expected to decrease. On the other hand, even if  
86 branching is slower than cell division, the transition towards significant branch thickening is  
87 expected to be strongly delayed compared to the previous section.

89 **D. Branching tree growth with constant tip speed and feedbacks**

90 Finally, combining the results from the previous sections, we can investigate the case of  
 91 branching trees together with feedback on proliferation from branch thickness/density. Again,  
 92 we make the simplifying assumption that all branches have equal thickness, something we will  
 93 relax in numerical simulations in the next sections. The equations for total cell number  $N(t)$ ,  
 94 total tree length  $L(t)$  and branch radius/width  $r(t) \propto \sqrt{N(t)/L(t)}$  read:

$$95 \quad \begin{cases} N'(t) = L'(t)r^2(t) + 2r(t)L(t)r'(t) = k_d N(t) \left(1 - \frac{w(t)}{w_0}\right) \\ L'(t) = \frac{v_0}{k_b} e^{k_b t} \end{cases} \quad (S7)$$

96 Interestingly, this again revealed two regimes of growth. At early stages of small cell numbers,  
 97 migration dominates over proliferation, and branches are expected to be thin ( $r \ll w_0$ ) allowing  
 98 for fast growth at rates close to  $k_d$ . Thus, the total number of cells in a branched organoid is  
 99 expected to grow exponentially as  $e^{k_d t}$  at early time points. At later times however, the width  
 100 converges towards a steady state, and we find that this growth phase is limited by the branching  
 101 rate, with cell numbers growing as  $e^{k_b t}$ , so that

$$102 \quad w(\infty) = w_0(1 - k_b/k_d) \quad (S8)$$

103 which corresponds to a width smaller than the maximal one  $w_0$  at which proliferation stops, and  
 104 at which the proliferation is slowed down enough to allow a steady-state, corresponding to a  
 105 match between the branching rate  $k_b$  and the division rate  $k_d(1 - w/w_0)$ . It should be noted that  
 106 this can only occur for  $k_b < k_d$ , which is similar to the criterion to the section above: if branching  
 107 is faster than divisions, then branches would thin to zero-radius because branch proliferation  
 108 could not keep up with the generation of moving tips.

109

110 **II. PARAMETER ESTIMATION AND MODEL PREDICTIONS**

111 We now seek to estimate each of the model parameter from the data, as well as experimentally  
112 verify some of our key assumptions.

113 We note that we intentionally restrict our model to the modelling of the branching and early  
114 thickening dynamics, occurring in general between day 1 and 9, and excluding the Lumen  
115 Formation phase of the organoids. Indeed, we experimentally find that, while the Onset,  
116 Extension, and early Thickening phases rely on similar processes of extension, branching, and  
117 proliferation, the late Thickening phase involves strong contraction, and the Lumen Formation  
118 phase appears to involve different processes, such as fluid intake, fluid pressure, or cell shape  
119 changes.

120 The formation of a lumen inside the branches also complicates the extension of the present  
121 model to the Lumen Formation phase: indeed, it would imply redefining the way some  
122 parameters are defined between phases, ultimately leading to a different model, with different  
123 validating experiments. For instance, the present manuscript uses the width of the branches as  
124 a proxy to estimate the maximal division rate  $k_d$ : this approximation is valid when the branches  
125 are not hollow; it however loses its validity when the lumen start swelling, and when fluid  
126 intake starts contributing to the thickness of the branch, independently of whether proliferation  
127 is actually taking place.

#### 128 *A. Assumptions of migratory and proliferation feedback*

129 A key assumption that we have made is to i) assume a feedback from branch thickness on  
130 proliferation and ii) to take it as a linear dependency for simplicity (although the analysis would  
131 be largely similar in the presence of more complex functional forms). To check this in the data,  
132 we made use of a live-imaging dataset for organoid morphogenesis between day 7 to day 10,  
133 where we tracked the morphometrics of single branches in real-time for a few hours. This  
134 included a systematic quantification of tip speed, branch length and branch width for a number  
135 of randomly selected terminal branches in the organoid.

136 As a proxy for proliferation, we calculated at each time point the volume of a branch  $V(t) =$   
137  $\pi w^2(t)L(t)/4$ , and estimated the rate of volumetric growth  $K(t)$  (which is a proxy for division  
138 rate  $k_d$ , although in principle a death rate of cells would negatively impact volume, so that the  
139 rate  $k_d$  could be seen as a balance between growth and loss) by comparing consecutive time  
140 points (separated by  $\Delta t$ ) as  $K(t) = \frac{V(t+\Delta t)-V(t)}{V(t)\Delta t}$ . We checked that the average  $\langle K(t) \rangle$  over all  
141 branches was approximately constant in time, as expected when considering time scales of a  
142 few hours, which served as a control that the system is not slowing down due to photo-toxicity  
143 while imaging for instance.

144 Importantly, although  $K(t)$  was very broadly distributed, plotting its value for each branch at  
145 each time point against the corresponding branch width  $w(t)$  revealed a clear trend, where  
146 growth was markedly slowed down for larger branch radius, in a roughly linear manner. This  
147 verifies one of our key assumptions and allows us, from comparing data with the model of  $K =$   
148  $k_d(1 - w/w_0)$ , to fit both the maximal division rate  $k_d$  and the maximal width  $w_0$  (at which  
149 proliferation is fully abrogated). Quantitatively, from a linear fit (Fig. 4b), we find  $k_d = 3.9 \pm 1.2$   
150  $d^{-1}$  and  $w_0 = 25 \pm 6 \mu\text{m}$  (best fit parameter  $\pm$  standard error of the fit).

151 A second important assumption from the section above is that we considered tip speed  $v_0$  to be  
152 constant. Given the dependency of volumetric branch growth on branch width, we reasoned  
153 that it was an important control to see whether or not the speed of a given tip was correlated to  
154 the morphometric of its branch (width or length). However, we found no such correlation, and  
155 a constant value of  $v_0 = 80 \mu\text{m/day}$  was extracted from this dataset (Fig. 5h). We also found that  
156 detached cells migrated through the matrix at a similar velocity, arguing that tip  
157 movement/matrix degradation is the dominant phenomena setting tip growth (as opposed to  
158 stresses from the bulk/leader cells, which could explain why tip speed is not dependent on  
159 branch morphometrics).

160

161 **B. *Estimation of other parameters***

162 Although measuring the branching rate from live-imaging is technically difficult, it can be  
163 estimated by comparing the tip elongation rate  $v_0$  to the average length of a branch  $l_0$ , which we  
164 found to be  $l_0 \approx 150 \mu\text{m}$ . From this, we could estimate that a constant branching rate of around  
165 once every 2 days  $k_b \approx 0.55 \text{ d}^{-1}$ , further corroborated by measuring the average number of  
166 branches of organoids from day 1 to day 9 (Fig. 4f, and see A. Summary of parameter  
167 estimation and simulation inputs in the Supplementary Note).

168

169 **C. *Predictions from the model on unperturbed and perturbed organoid growth***

170 With these orders of magnitude, one can estimate that the transition from 1D cell density/branch  
171 thickness decrease (due to linear growth of the tip) to density/thickness increase where contact  
172 inhibition (due to proliferation) should occur on very rapid time scales of less than a day. This  
173 means that organoid growth should largely be over during these timescale (i.e. if there weren't  
174 branching events). However, as mentioned above, tip branching at rate  $k_b$  causes an exponential  
175 increase of the number of tips at rate  $e^{k_b t}$ , and if each of these tips elongate at a speed  $v_0$ , this  
176 means that the "edge" of the pancreas grows exponentially - rather than linearly in the case of  
177 a single branch (or classical 1D/2D/3D cohesive cellular colonies). We predict that such an  
178 exponential branching allows pancreatic organoids at their "full" exponential capability  $k_d$  to  
179 grow for longer (3-4 days), with contact inhibition occurring only after, and branching allowing  
180 continued exponential growth (albeit at a slow rate  $k_b$ ), which matches well the experimental  
181 observations.

182 More quantitatively, turning to the prediction for the average number of cells in time in an  
183 organoid, we found that the model predicted very well the data across all time points (see Fig.



184 4d, even though the width to proliferation feedback was fitting only from short-term tracking  
185 around day 7). In particular, the model reproduces well the inflexion of growth shown in the  
186 data (Fig. 2d, Fig. 4d), which is predicted to arise due to the increase of average branch thickness  
187 in time (which feedbacks negatively on proliferation). Again, both of these predicted features  
188 agreed well with the data showing i) a steady decrease in the number of proliferative cells (as  
189 assessed by the Ki67 to DAPI ratio, Fig. 2c-e), and ii) a steady increase in branch thickness  
190 within the first days, then a more gradual plateau until day 10 (Fig. 4d).

191 We note that the apparent deviation of the “experimental” terminal branch average thickness  
192 from the “theoretical” value at day 8 and 9 (Fig. 4e), can be explained by the fact that, due to  
193 heterogeneity, some organoids phenotypes can display budding and occasionally start lumen  
194 expansion earlier than others, thereby driving the increase in apparent average thickness. As the  
195 current model does not take into account the lumen formation phase, for aforementioned  
196 reasons, such discrepancies might emerge. While, for comparison purposes with the model, we  
197 have taken care to exclude branches that displayed obvious, large and optically resolvable  
198 lumens, early fluid intake in branch tips (which can still lead to a noticeable increase in  
199 thickness), can be difficult to detect using the method described in the Methods section “Branch  
200 thickness measurement (static)”.

201 We then proceeded to test some of the model predictions upon pharmacological perturbation.  
202 We first performed a batimastat treatment, which is expected to decrease the ability of tip cells  
203 to migrate through the ECM. Indeed, we found that upon addition of batimastat at day 7, average  
204 tip speed was reduced to zero. We input this in the model (together with a reduction of branch  
205 growth of 80% which we found experimentally, and could be due to secondary effects of the  
206 drug). We found that whereas WT organoids grew little in width between day 7 and day 9 (as  
207 expected in the second phase of growth predicted by the model), batimastat-treated organoids

208 were predicted to show larger branch thickness growth (proliferation without concomitant  
209 elongation), something we observed experimentally (Fig. 5c and Fig. S6f).

210 Turning to aphidicolin treatments, we found that it displayed an inhibition of tip volumetric  
211 growth ( $k_d$  reduced by 56%), as expected from this drug, while having a more moderate effect  
212 on tip elongation speed ( $v_0$  reduced by 42%). Modelling these changes in the model from day  
213 7 predicted a decrease in branch thickness (due to continued elongation with less proliferation),  
214 a feature that mirrored the data of branch thinning upon aphidicolin treatment (Fig. S6d, S6h).

215

### 216 III. NUMERICAL SIMULATIONS OF SPATIAL BRANCHED ORGANOID 217 GROWTH

218 So far, we have used a mean-field model to fit the data, where we have averaged morphological  
219 parameters over an entire organoid, and predicted the temporal variations of these averages.  
220 However, the model described above can easily be simulated spatially.

221 To do this, we took the framework of branching random walks in space<sup>8</sup>, where an organoid is  
222 represented by elongating and branching tips (resp. at constant deterministic speed  $v_0$  and  
223 stochastic rate  $k_b$ , i.e. branching as a Poisson process), as well as the ducts they leave behind.  
224 Each tip  $i$  is represented by its coordinates  $(x_i, y_i)$  in a 2D plane and each branch  $j$  has a given  
225 width  $w_j$  and length  $l_j$  (which elongates at rate  $v_0$  if connected to an active, unbranched tip).  
226 Branch width  $w_j$  can change either due to tip elongation (if the branch is terminal, i.e. connected  
227 to an active tip, which reduces width  $w_j$  to maintain constant branch volume upon elongation -  
228 no elongation occurs if the branch is not terminal), or due to growth (which increases width at  
229 rate  $K = k_d(w_0 - w_j)$  without changing length  $l_j$ ).

230 More specifically, given that the volume of a branch  $j$  is given by  $V_j = \pi l_j (w_j/2)^2$ , a tip  
231 elongation from a length  $l_j(t)$  at time  $t$  to a length  $l_j(t + \delta t) = l_j(t) + v_0 \delta t$  at time  $t + \delta t$

232 obeys the conservation law  $V_j(t) = V_j(t + \delta t)$ , meaning that it rescales width as  $w_j(t + \delta t) =$   
 233  $\frac{w_j(t)}{\sqrt{1+v_0\delta t/l_j(t)}}$ . Similarly, growth at rate  $K$  from time  $t$  to  $t + \delta t$  increases branch volume by a  
 234 quantity  $KV_j(t)\delta t$ , so that the width is rescaled as  $w_j(t + \delta t) = w_j(t)\sqrt{1 + K\delta t}$ .

### 235 **A. Summary of parameter estimation and simulation inputs**

236 Overall, the parameters that we use for the spatial simulations are the same as for the continuum  
 237 model (with a few additional variables that have little to no impact on the resulting dynamics),  
 238 which we summary here, both showing the values that we use for these parameters in Fig. 4,  
 239 but also the origin of their estimation:

- 240 • Growth parameters  $k_d$  and  $w_0$ . These have been fitted from the short-term imaging of  
 241 tip elongation and growth between day 7 and 10 – from a linear fit of the data shown in  
 242 Fig. 4b. Best-fit values used in the simulations:  $k_d = 3.9 d^{-1}$  and  $w_0 = 25 \mu\text{m}$ .
- 243 • Tip elongation velocity  $v_0$ . These have been estimated as the average of tip elongation  
 244 speed from the short-term imaging between day 7 and day 9, which show no significant  
 245 correlation with other variables such as tip width  $w$  (Fig. 5h, Fig. S5g). Values used in  
 246 simulation  $v_0 = 80 \mu\text{m/day}$ .
- 247 • Branching rate  $k_b$ . Estimated from the average branch length measured between day 7  
 248 and day 9 ( $l_0 \approx 150\mu\text{m}$ ), which together with an estimated elongation speed of  $v_0$ ,  
 249 would result in a typical branching rate of  $k_b = \frac{v_0}{l_0} \approx 0.55/\text{day}$ . Alternatively, we can  
 250 also fit it from the increase in branch number, which leads to a best fit value of  $k_b =$   
 251  $0.75/\text{day}$ , consistent with the alternative estimation. We note that the overall  
 252 quantitative dynamics of organoids is only weakly affected by this range of parameters  
 253 (which controls the second phase of slower exponential growth). Value used in  
 254 simulations  $k_b = 0.75/\text{day}$ .

- 255 • Initial conditions. At the beginning of the simulations (day 1), we considered that there  
256 is a single cell, consisting of a single branch. We initialize the simulations with a width  
257 of  $w = 5 \mu m$  and length of  $l = 20 \mu m$ . At each branching event, we apply the same  
258 initial condition, considering that the nascent branch has a width of  $w = 5 \mu m$ .
- 259 • Branching angle. This parameter does not impact any of the results, as tips do not  
260 interact spatially, and is thus only relevant for the visualization of the trees (Fig. 4c, 4h).  
261 We take angles of branching between mother and daughter branches of  $\pi/3$ .

262

### 263 ***B. Simulation output: variability in organoid branching***

264 A typical outcome of these simulations is shown in Fig. 4c, 4h - although we show in Fig. 4h  
265 that because of the stochasticity of the branching process different runs with the exact same  
266 parameters can have very different morphometrics (which could explain the variability we find  
267 in the data in a minimal way). Note that we neglected tip termination – as we model the first  
268 phase of growth where tips elongate at a near constant velocity (see above), so that the  
269 stochasticity comes purely from the timing of stochastic branching, rather than from spatial  
270 interactions between tips as in branching and terminating random walks <sup>8</sup>.

271 Importantly, when averaging over many simulations ( $n = 100$ , as shown in Fig. 4), we find that  
272 these recapitulate not only the temporal dynamics of branching (near-constant exponential  
273 growth in the number of branches per organoid, as predicted by a constant branching rate  $k_b$ ),  
274 but also the organoid to organoid variability (assessed by standard deviation in number of  
275 branches per organoids). Indeed, this standard deviation also grew exponentially with similar  
276 values as the average, providing a non-trivial prediction of our model of stochastic branching  
277 (Fig. 4f-g). Note that this model of stochastic branching also makes the prediction, at smaller  
278 scales, that branching can happen at any time with equal probabilities, so that we expect also a  
279 broad (exponential) distribution in branch length. We tested this by measuring non-terminal

280 branch length across organoids at day 7 to 10 during the extension phase. Keeping in mind that  
281 branches cannot have very small lengths (<15 microns, i.e. comparable to cell size), we indeed  
282 found that branch length was very broadly distributed and consistent with an exponential  
283 distribution (Fig. S5e). This is in contrast to what would happen with a Turing instability on a  
284 simple domain <sup>9</sup>, which would lead to periodic branching and thus highly peaked distribution –  
285 although continuous ductal growth can also cause more complex dependencies. This could be  
286 addressed in the future by measuring in further detail the relationship between branch age and  
287 length <sup>10</sup>, although the strong non-stereotypicity that we observe both between organoids and  
288 in different regions of a given organoid suggest that intrinsic branching stochasticity is a simple  
289 explanation for the broadness of the length distribution.

290

### 291 **C. *Simulation output: temporal dynamics in branch thickening and cell number***

292 When comparing the average predictions of the simulations with the analytical model, we found  
293 that both agreed well with each other. In particular, when examining the total cell number per  
294 organoid, the simulations confirm the predicted cross-over between exponential growth at rate  
295  $k_d$  initially (Fig. S6a-d, left column) when branch thickness is small (Fig. S6a-d, right column),  
296 before a second phase where thickness plateaus and growth of cell numbers (Fig. S6a-d) still  
297 follow an exponential trend but at rate  $k_b$ . Manipulating the branching rate  $k_b$ , elongation speed  
298  $v_0$  and division rate  $k_d$  in the computational model by halving or multiplying by two their value  
299 compared to the measured parameters confirmed these insights (see Fig. S6a-d for such a  
300 sensitivity analysis).

301 In particular, the simulations agreed well with the analytical prediction that branch width should  
302 plateau to a value of  $w = w_0(1 - k_b/k_d)$  (which represents a compromise between thickening  
303 via growth and thinning via branching/elongation). Using the parameters inferred above, this  
304 plateau width is predicted to be approximately 20  $\mu\text{m}$ , which fits well with the data after a first

305 phase of gradual thickening during the first days (Fig. 4e). Conversely, when examining the  
306 average number of cells per organoid, we found similar dynamics as predicted, with a first phase  
307 of very fast growth well-fitted by the model (close to  $k_d$ ) before a second phase of slower  
308 growth (dictated by  $k_b$ ) – see Fig. 4d.

#### 309 ***D. Simulation output: spatial dynamics of tip and branch morphometrics***

310 Finally, we also predict in the simulations some spatial features (which are by definition beyond  
311 the scope of the analytical, non-spatial model). For instance, newly formed branches first  
312 undergo a phase of branch thinning due to tip elongation before containing enough cells so that  
313 proliferation dominates (and width increases) - and so that branch width plateaus to its maximal  
314 value at which proliferation is arrested. Thus, the simulation predicts a dependency of width on  
315 branch "age": branches close to the origin of the organoid are the widest and less proliferative  
316 while more recently formed branches at the periphery are thinner and more proliferative. This  
317 fits qualitatively with our observations of branching morphologies (Fig. 2c-e), and to back this  
318 up more quantitatively, we separately outputted in the simulations the width of terminal  
319 branches (which are elongating) and non-terminal branches (generation of more than one since  
320 the origin). This was binned in such two categories to be able to straightforwardly compare to  
321 data, where we separately measured at all time points the width of tip branches and the width  
322 of branches past a branch point. Interestingly, we found good agreement between data and  
323 simulations, with both quantities showing a plateau in time (as does the average width across  
324 all branches), but at very different width (Fig. 4e).

325 In the computational model, it was also possible to explore the effect of additional potential  
326 mechanisms. Indeed, so far we have treated each branch as separate, non-communicating  
327 entities (so that volumetric growth of a branch was only due to its proliferation). However, in  
328 particular at the initial stage where a new top just branched, and volume of a new branch is  
329 very small, it could be that fluxes occur between branch and are significant for volumetric

330 growth. To model this in a simple way, we performed the simulations again, but allowing for  
331 pressure driven fluxes  $q_{ij}$  to occur between two branches in contact  $i$  and  $j$  (from  $i$  to  $j$ ). For  
332 simplicity, we took the simplest linear constitutive equation  $q_{ij} = -\alpha(w_i - w_j)$  (i.e.  $\alpha > 0$   
333 necessary for stability, meaning that wide branches flow into thin ones, a simple assumption  
334 based on the fact that width  $w_i$  is proportional to the pressure exerted on surrounding matrix).  
335 Importantly however, when exploring different values of  $\alpha$ , we found that these did not  
336 markedly change the dynamics, when plotting the total cell number (Fig. S6a, left) or branch  
337 thickness (Fig. S6a, right). The main change was that  $\alpha$  "smoothed" the spatial variations with  
338 branch age (for  $\alpha \rightarrow \infty$ , all branches have the same thickness and the mean-field model is  
339 recovered exactly).

340

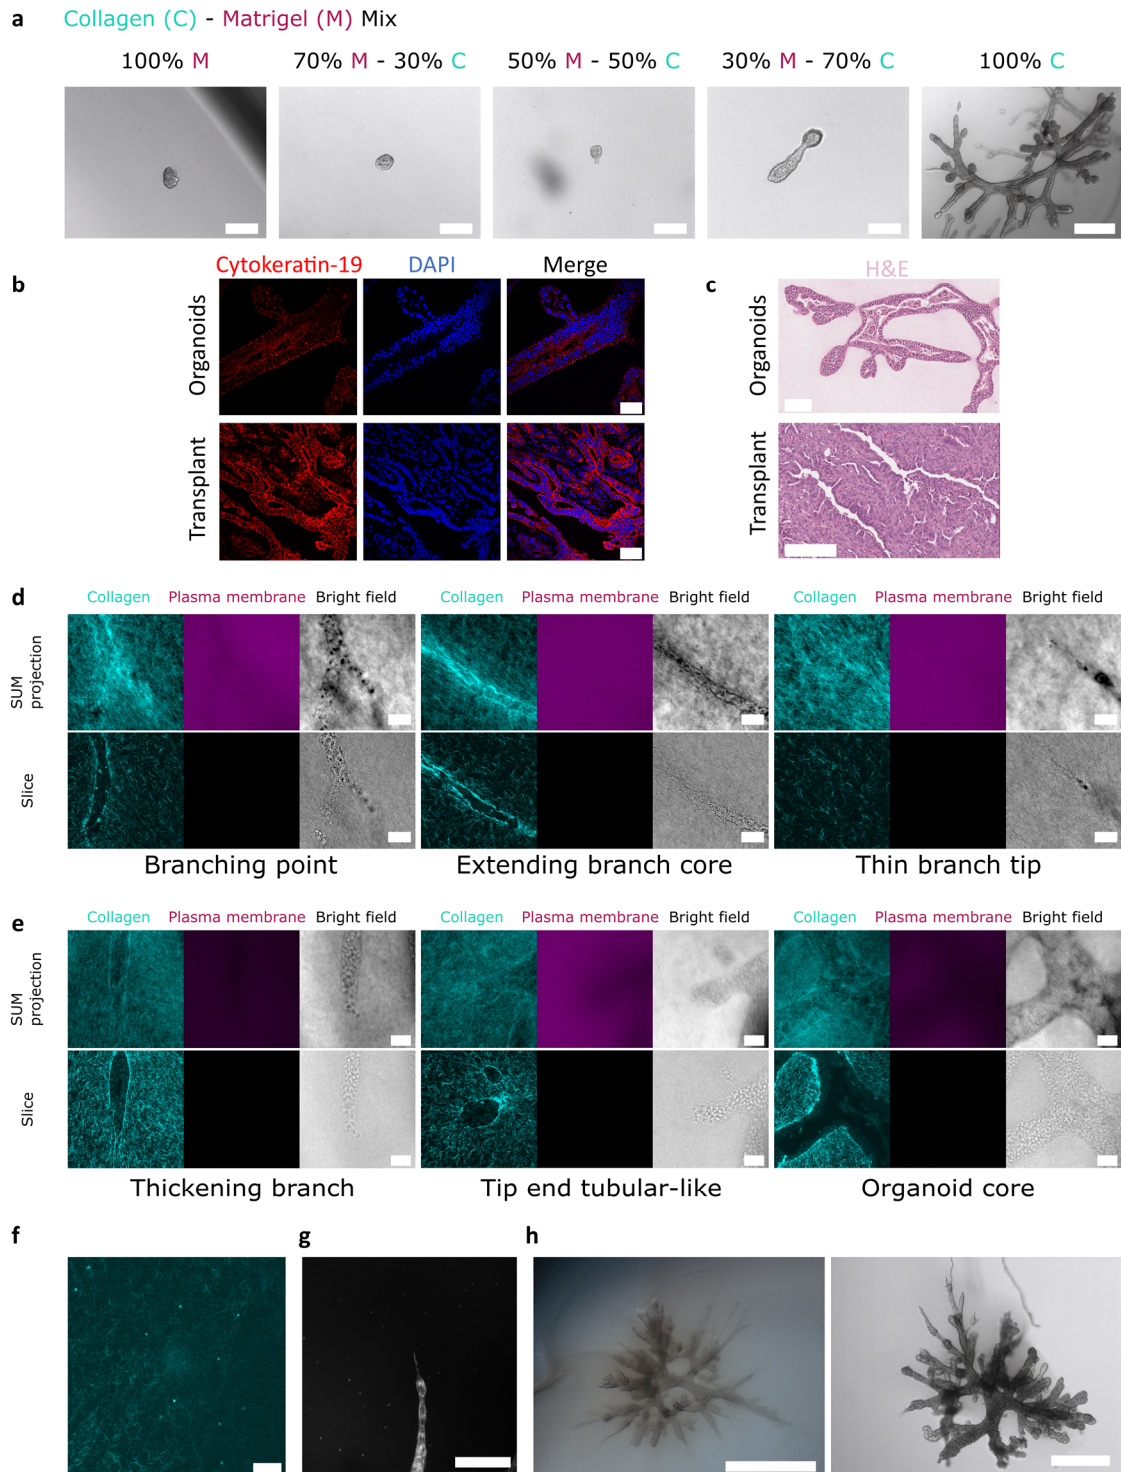

341

342 **Fig. S1. Influence of the matrix composition, and remodeling of the collagen**  
 343 **environment.**

344 **(a)** Bright field pictures of organoids at day 13 (D13), cultured in mixtures of collagen I and  
 345 Matrigel in various proportions (n = 3 individual experiments).



346 **(b)** Immunostaining of Cytokeratin-19 (red) and DAPI staining (blue) in D13 collagen-grown  
347 PDAC organoids and *in vivo* transplants of PDAC cells (n = 3 technical replicates).

348 **(c)** Haematoxylin and eosin (H&E) staining of D13 collagen-grown organoid and orthotopic  
349 transplant sections (n = 3 technical replicates).

350 **(d), (e)** Organoids were treated at D8 (d, n = 3 organoids) or D11 (e, n = 3 organoids) with  
351 Triton-X 100 and fixed. Triton-X 100 degrades the cell membrane and provoke the  
352 dissociation of organoids. Organoids are stained with CellMask, a plasma membrane marker  
353 (magenta), to ensure that the membrane has been properly washed away after the Triton-X  
354 treatment. Collagen fibers are visualized with reflection microscopy (cyan). The architecture  
355 of the collagen surrounding the organoids is preserved, indicating a plastic deformation of the  
356 ECM. Summed slices projections and single confocal slices are shown.

357 **(f)** Collagen fibres far away from organoids, visualized with reflection microscopy (n = 3  
358 organoids). The fibres display no particular alignment far away from organoids. Confocal  
359 slice.

360 **(g)** Plasma membrane staining of an invasive protrusion at D7 (n = 13 organoids). Summed  
361 slices projection.

362 **(h)** Bright field pictures of a D13 organoid in collagen (left) and after collagen digestion  
363 (right) (n = 3 individual experiments).

364

365 Scale bars in (a), from left to right: 200  $\mu\text{m}$  for the first four pictures, 500  $\mu\text{m}$  for the fifth; in  
366 (b): 50  $\mu\text{m}$ ; in (c), 100  $\mu\text{m}$  (top), 200  $\mu\text{m}$  (bottom); (d), (e), (f): 50 $\mu\text{m}$ ; in (g): 100  $\mu\text{m}$ ; in (h)  
367 from left to right: 1000  $\mu\text{m}$ , 500  $\mu\text{m}$ .

368

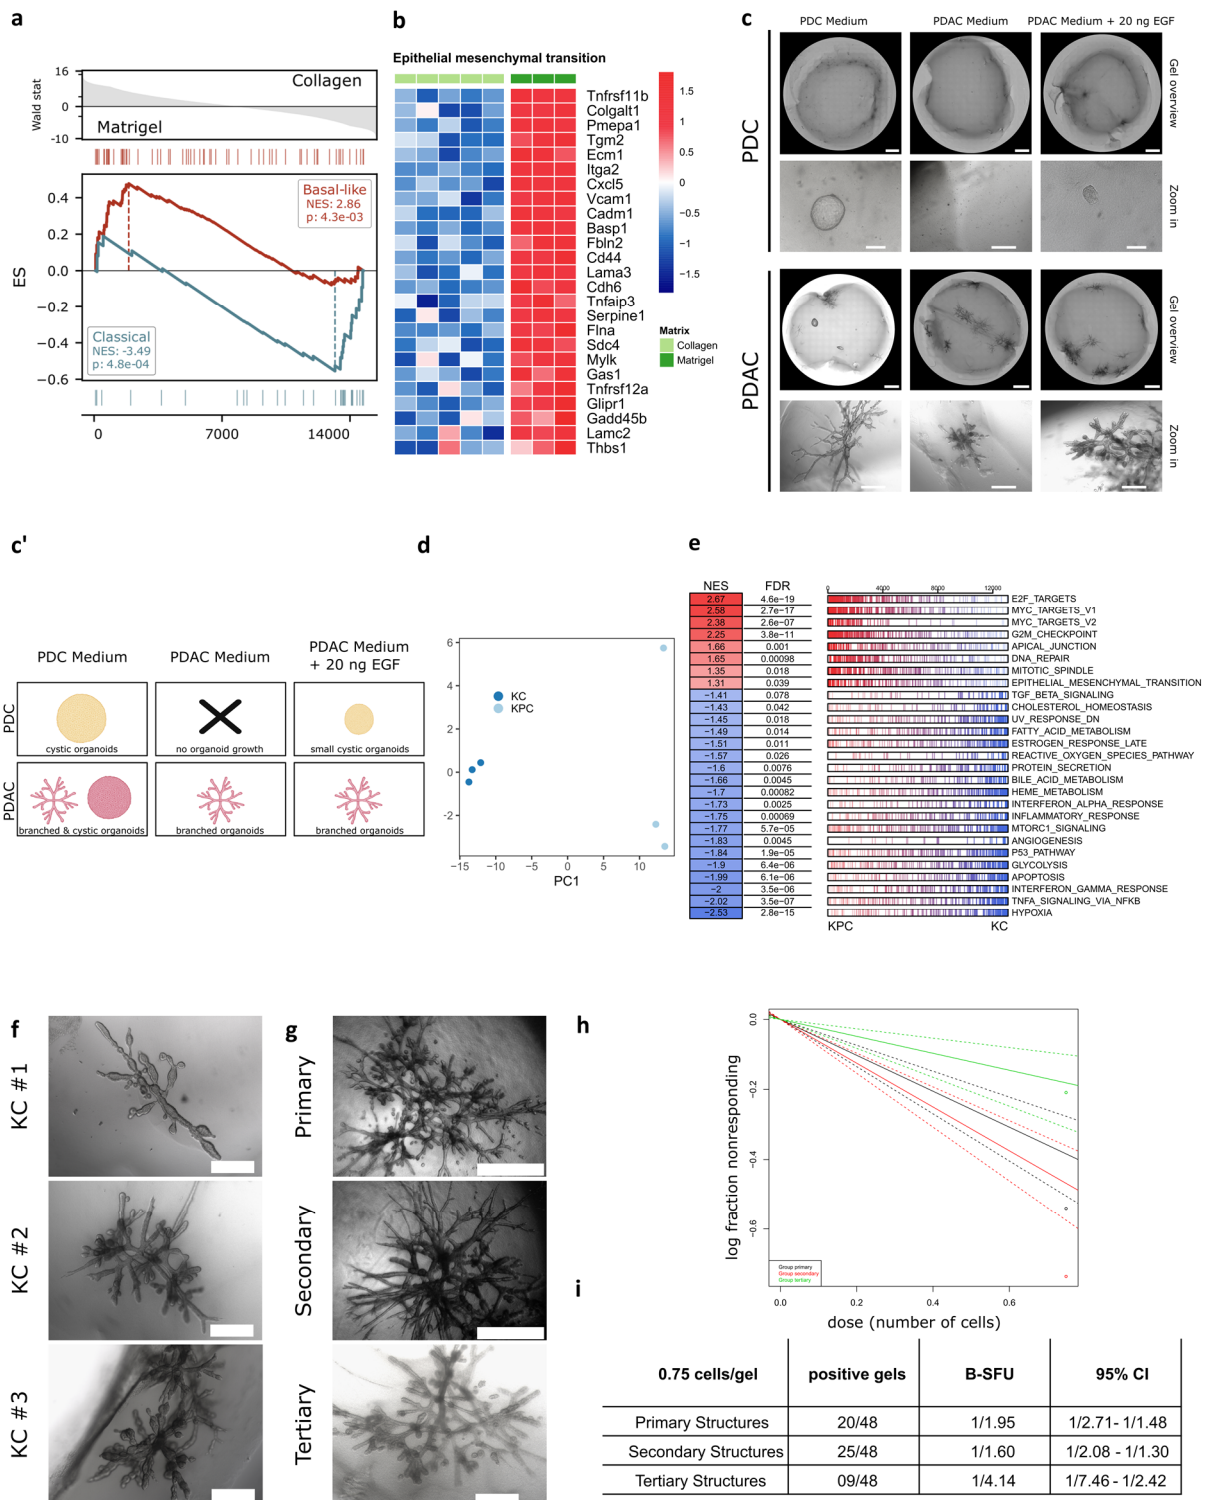

369

370 **Fig. S2. PDAC organoids epithelial plasticity drives branching morphogenesis with**  
 371 **distinct structure forming capabilities.**

372 **(a)** Expression scores for the “Classical” and “Basal-like” signatures displayed by Matrigel-  
 373 and collagen-grown organoids at Day 13.

374 **(b)** Expression patterns for epithelial to mesenchymal transition (EMT) related markers,  
375 differentially expressed between Matrigel- and collagen-grown organoids at Day 13.

376 **(c)** Representative collagen gels containing PDC or PDAC cells, cultured in PDC medium  
377 (see Methods for the full composition)<sup>11</sup>, DMEM + 10 % FBS (PDAC medium), and PDAC  
378 medium + 20 ng EGF. Results are summarized graphically in **(c')**: PDC form cystic  
379 organoids in PDC medium, and small cystic organoids in PDAC medium + 20 ng EGF.  
380 PDAC cells can form both branched or cystic organoids in PDC medium, and form branched  
381 organoids in PDAC medium and PDAC medium + 20 ng EGF. Created with BioRender.com  
382 “Gel overview” pictures scale bars: 2000  $\mu\text{m}$ . “Zoom-in” PDC pictures scale bars, from left to  
383 right: 200  $\mu\text{m}$ , 500  $\mu\text{m}$ , 100  $\mu\text{m}$ . “Zoom-in” PDAC pictures scale bars: 500  $\mu\text{m}$ . “Gel  
384 overview” pictures were stitched from a tile scan of a culture well and cropped to display the  
385 collagen gel.

386 Principal component analysis of bulk RNA sequencing of Day 13 collagen-grown organoids  
387 originating from cells derived from KC or KPC mice **(d)**, and corresponding summary of gene  
388 set enrichment analysis **(e)**. NES, FDR bars represent each individual gene for a given gene  
389 set.

390 **(f)** Representative Day 13 collagen-grown organoids originating from PDAC cells derived  
391 from three distinct KC mice ( $n = 3$  individual experiments). Scale bars: 500  $\mu\text{m}$ .

392 **(g)** Organoids were grown until Day 13 in collagen (“Primary” structures), dissociated at the  
393 single cell level and then seeded again in collagen, giving rise to “Secondary” structures.  
394 Repeating this process on “Secondary” structures at Day 13 in turn yielded “Tertiary”  
395 structures. Scale bars, from top to bottom: 1000  $\mu\text{m}$ , 1000  $\mu\text{m}$ , 500  $\mu\text{m}$ .

396 **(h)** Log plot of non-responding well against cell dose.

397 **(i)** Extreme Limiting Dilution Analysis summary table.



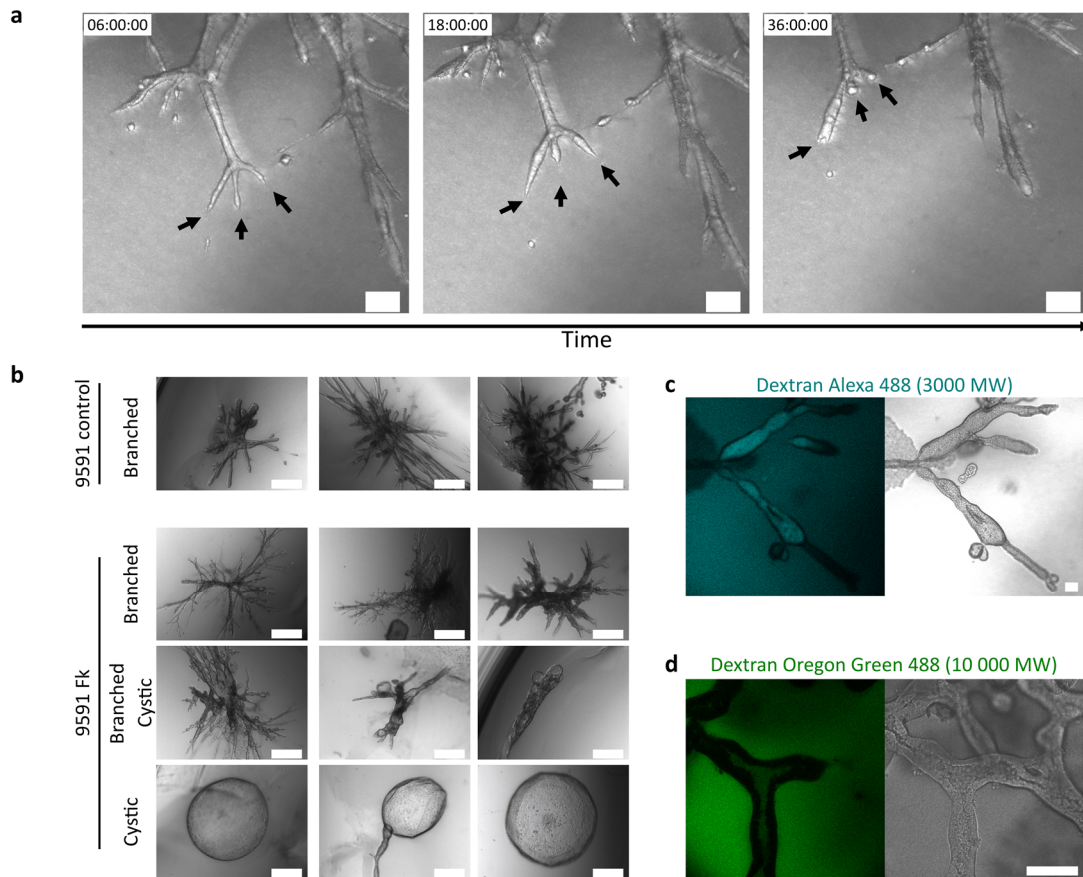

399

400 **Fig. S3. Chemical perturbations via aphidicolin and forskolin.**

401 (a) Bright field time-lapse of an organoid branch upon addition of  $2 \mu\text{g.mL}^{-1}$  of aphidicolin at  
 402 D7. Black arrows indicate spots of branch rounding and retraction.

403 (b) Bright field pictures of organoids at D13 in control conditions and upon addition of  
 404 forskolin (Fk) at  $10 \mu\text{M}$ . Forskolin addition triggers the apparition of cystic organoids, with  
 405 lumens over-swelling ( $n = 3$  individual experiments).

406 (c), (d) Dextran Alexa 488 ((c), 3000 MW, cyan,  $200 \mu\text{g.mL}^{-1}$ ,  $n = 3$  replicates) or Dextran  
 407 OregonGreen ((d), 10 000 MW, green,  $200 \mu\text{g.mL}^{-1}$ ,  $n = 2$  replicates) can be incorporated  
 408 inside the lumen upon overnight incubation at D13-14. Confocal slices shown.

409 Scale bars in (a), (c), (d):  $100 \mu\text{m}$ ; in (b):  $500 \mu\text{m}$ .

410

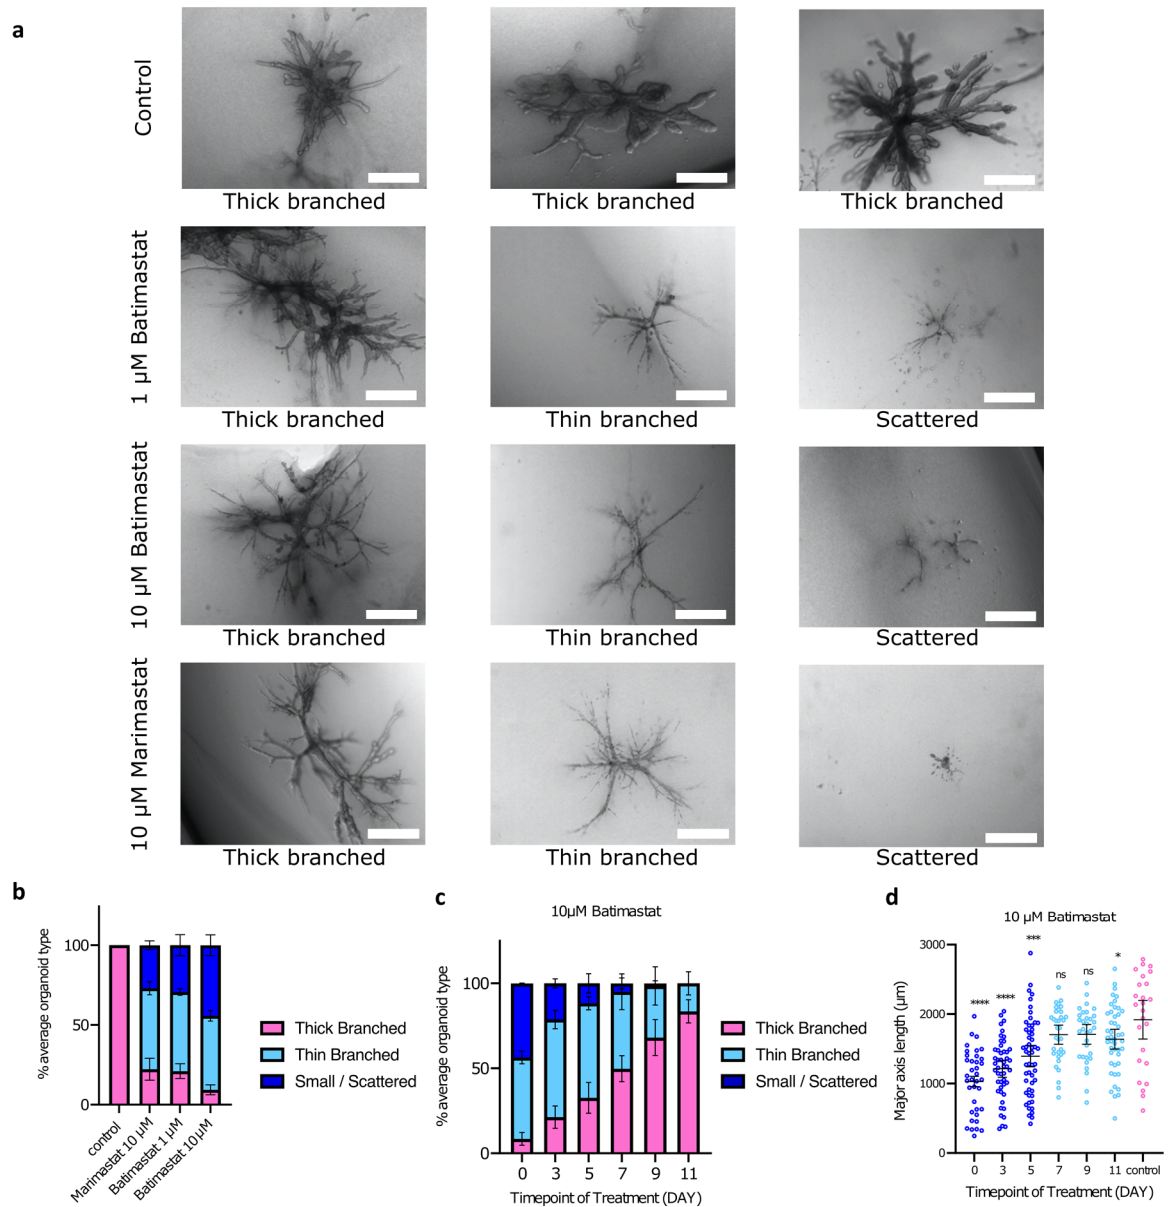

411

412 **Fig. S4. Effect of MMP inhibition on collagen-grown organoid development.**

413 **(a)** Bright field pictures of organoids at day 13 in control conditions and upon addition of  
 414 batimastat at 1  $\mu\text{M}$  or 10  $\mu\text{M}$ , or marimastat at 10  $\mu\text{M}$  (Control: n=156, Marimastat 10 $\mu\text{M}$ :  
 415 n=106, Batimastat 1 $\mu\text{M}$ : n=110, Batimastat 10 $\mu\text{M}$ : n=129, organoids). Organoids are labelled  
 416 according to their phenotype, in "Thick branched", "Thin branched" and "Scattered"  
 417 categories. Scale bars: 500  $\mu\text{m}$ .

418 **(b)** Distribution of organoid phenotypes at day 13 according to the different MMP-inhibitors  
419 used and added at seeding time (Control: n = 156, Marimastat 10 $\mu$ M: n = 106, Batimastat  
420 1 $\mu$ M: n = 110, Batimastat 10 $\mu$ M: n = 129, organoids). Bars: mean  $\pm$  sem.

421 **(c)** Distribution of organoid phenotypes at day 13 according to the addition day of 10  $\mu$ M  
422 batimastat. (Control: n = 82, Batimastat: n = 589, organoids). Bars: mean  $\pm$  sem.

423 **(d)** Major axis length of organoids at day 13 upon addition of 10  $\mu$ M batimastat at different  
424 timepoints (n = 275 organoids). Bars: mean  $\pm$  sem. Un-paired two tailed parametric t-test; \* P  
425 = 0.0465, \*\*\* P = 0.0006, \*\*\*\* P  $\leq$  0.0001, ns P = 0.131 (batimastat addition at day 7) and P  
426 = 0.149 (batimastat addition at day 9).

427 All statistical tests performed against the control population.

428

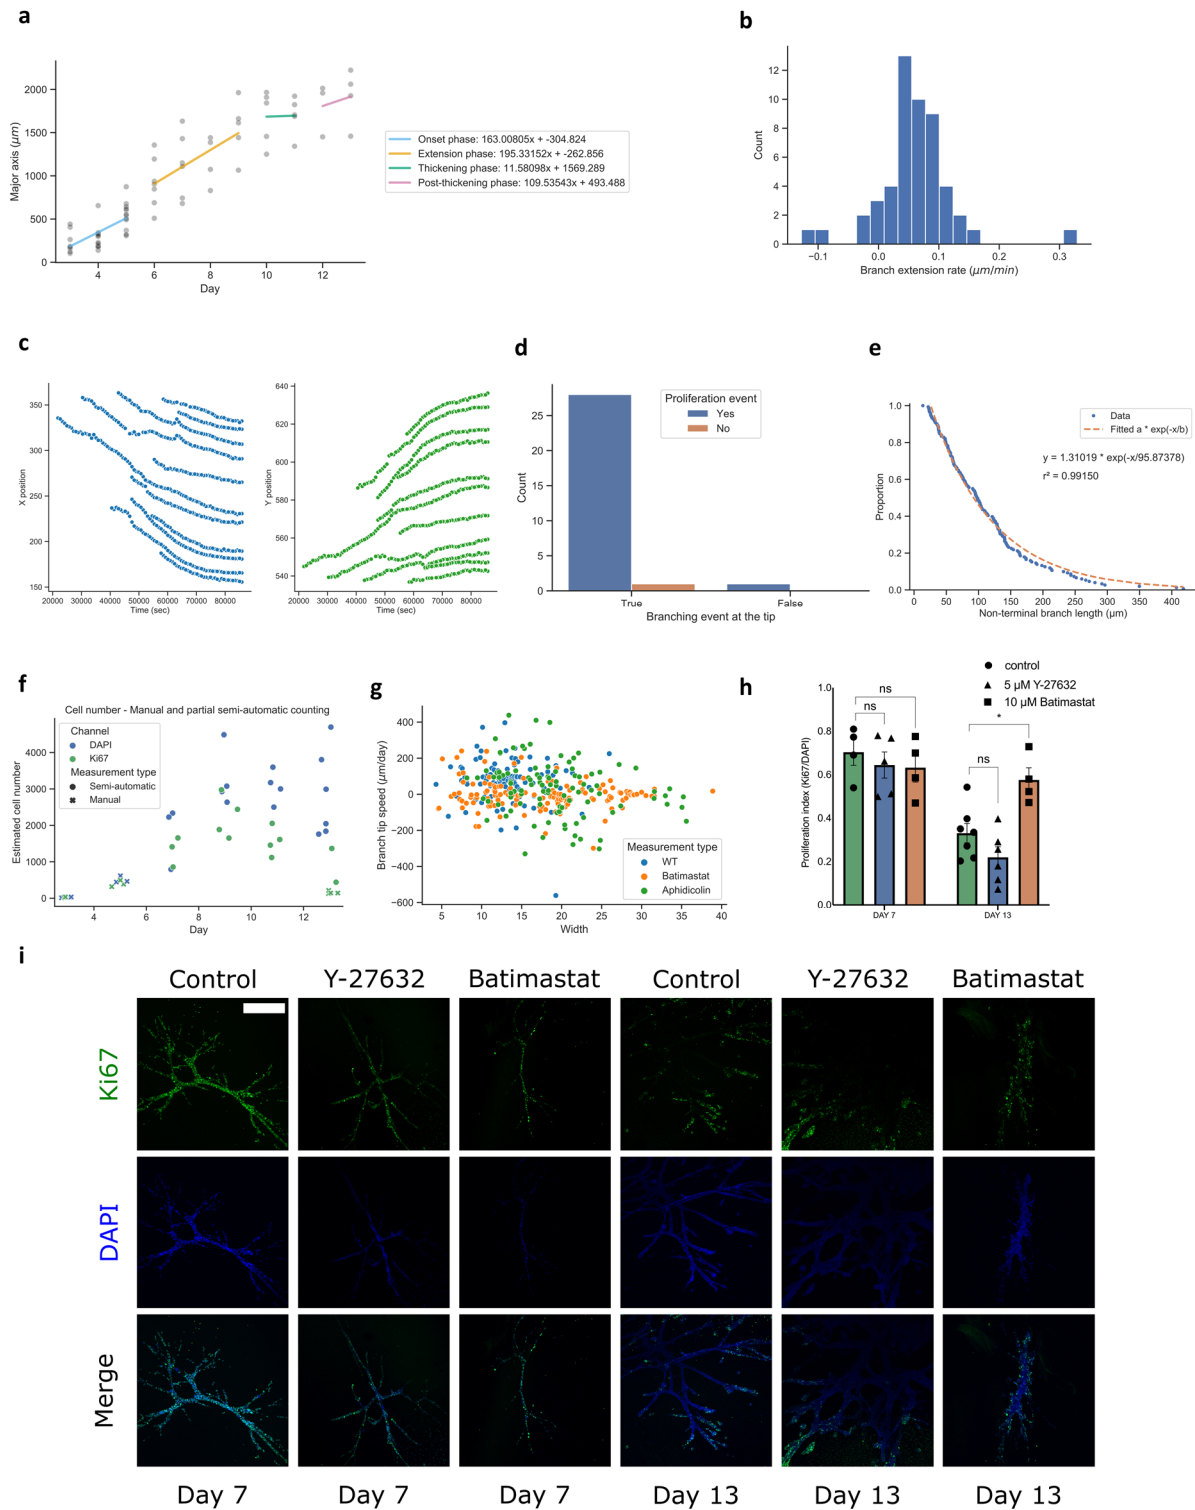

429

430 **Fig. S5 Quantifications of extension and proliferation dynamics in PDAC organoids.**

431 **(a)** Major axis length evolution of collagen-grown organoids over time with linear fits

432 highlighting the different phases (blue: Onset, orange: Extension, green: Thickening, pink:

433 Post-thickening;  $n = 71$  organoids).



434 **(b)** Mean branch extension rate distribution between day 7 and 10 (n = 51 branches).

435 **(c)** X (blue) and Y (green) positions for cells in an extending branch, representative of the  
436 dominant extension behavior between day 7 and 10.

437 **(d)** Correlation between branching and proliferation events in the leading 6 cells of a branch  
438 tip between day 7 and 10. True-Yes: branching event was preceded by a proliferation event.  
439 True-No: branching event occurred without being preceded by a proliferation event. False-  
440 Yes: proliferation event occurred but a branching event did not follow (n = 30 events, N = 4  
441 organoids).

442 **(e)** Complementary empirical cumulative distribution function of non-terminal branch lengths  
443 for organoids at day 7-10 (blue dots, n = 151 branches, N = 4 organoids) and fitted curve for  
444 an exponential distribution (dashed orange line).

445 **(f)** DAPI (blue) and Ki67-positive (green) cell numbers estimated from maximum projections  
446 using manual or semi-automated counting, at day 3, 5, 7, 9, 11, and 13 (n = 24 organoids).

447 **(g)** Instantaneous branch tip speed versus branch width for untreated (WT, blue, n = 103  
448 points, N = 3 organoids), batimastat- (orange, n = 142 points, N = 2 organoids), and  
449 aphidicolin-treated (green, n = 103 points, N = 3 organoids) organoids at the extension stage.

450 **(h)** Ki67-positive cells over DAPI-positive cells ratio for untreated, Y-27632-treated and  
451 batimastat-treated organoids at day 7 and day 13, and representative stainings **(i)**. Bars: mean  
452  $\pm$  sem. Un-paired two-tailed parametric t test with Welch's correction; \* P = 0.0116, ns P =  
453 0.513 (day 7 control versus day 7 addition of Y-27632), P = 0.4632 (day 7 control versus day  
454 7 addition of batimastat), P = 0.1201 (day 13 control versus day 13 addition of Y-27632).  
455 Scale bar: 100  $\mu$ m. Day 7: control n = 4, batimastat n = 4, Y-27632 n = 5 organoids. Day 13:  
456 control n = 7, batimastat n = 4, Y-27632 n = 6 organoids.

457

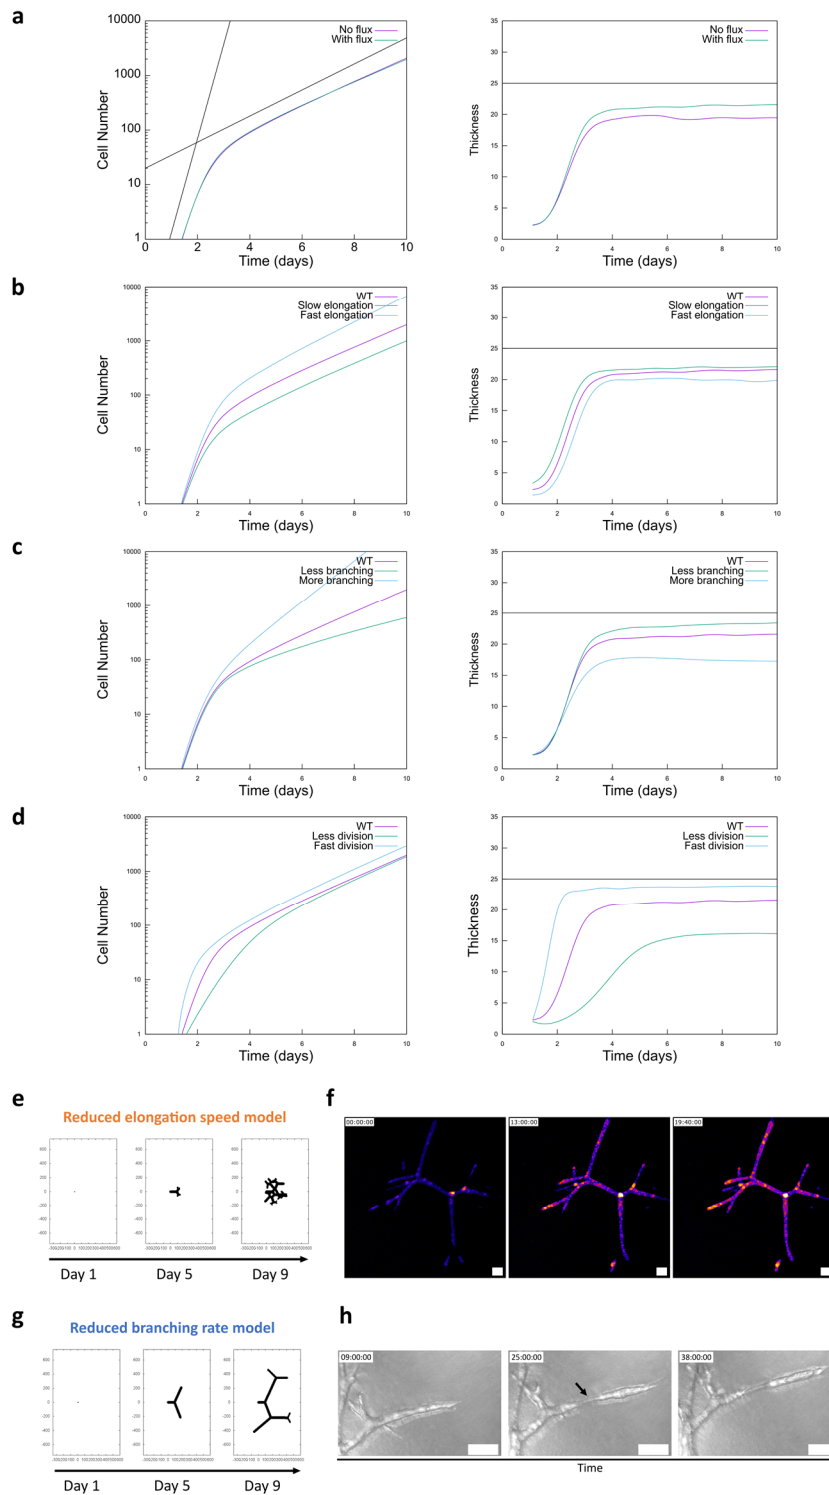

458

459 **Fig. S6. Additional simulations using the minimal biophysical model.**

460 (a-d) Model predictions of cell number evolution (left column) and of mean branch thickness  
 461 evolution (right column), under different simulation parameters. Black lines in (a) are shown  
 462 as a guide to the eye to indicate the initial exponential growth phase, before the plateauing.

463 Black lines in the right column graphs indicate the maximum width  $w_0$  allowed by the growth  
464 feedback, in absence of branching and elongation. Plots are averaged over  $n=30$  simulations.

465 **(a)** With/without cell flux between branching point;

466 **(b)** With slower/faster elongation speeds compared to the WT parameters (elongation speed  
467 respectively divided by 2 and multiplied by 2);

468 **(c)** With less/more branching comparing to the WT parameters (branching rate respectively  
469 divided by 2 and multiplied by 2);

470 **(d)** With less/more division compared to the WT parameters (cell division rate respectively  
471 divided by 2 and multiplied by 2).

472 **(e)** Spatial simulation of the branching process over time in pancreatic organoids using a  
473 reduced branch elongation speed.

474 **(f)** Local thickness increase visualization in a D8-9 organoid upon addition of 10  $\mu\text{M}$   
475 batimastat. The bright spots indicate areas of increasing thickness. The organoid does not  
476 extend in size but thickens, as predicted qualitatively by the model.

477 **(g)** Spatial simulation of the branching process over time in pancreatic organoids using a  
478 reduced branching rate speed.

479 **(h)** Bright field time-lapse of an organoid branch upon addition of 2  $\mu\text{g.mL}^{-1}$  of aphidicolin at  
480 D7. Black arrows indicate a spot of local branch thinning due continued cell migration but  
481 inhibited proliferation, as predicted qualitatively by the model.

482 Scale bars in (f), (h): 100  $\mu\text{m}$ .

483

484

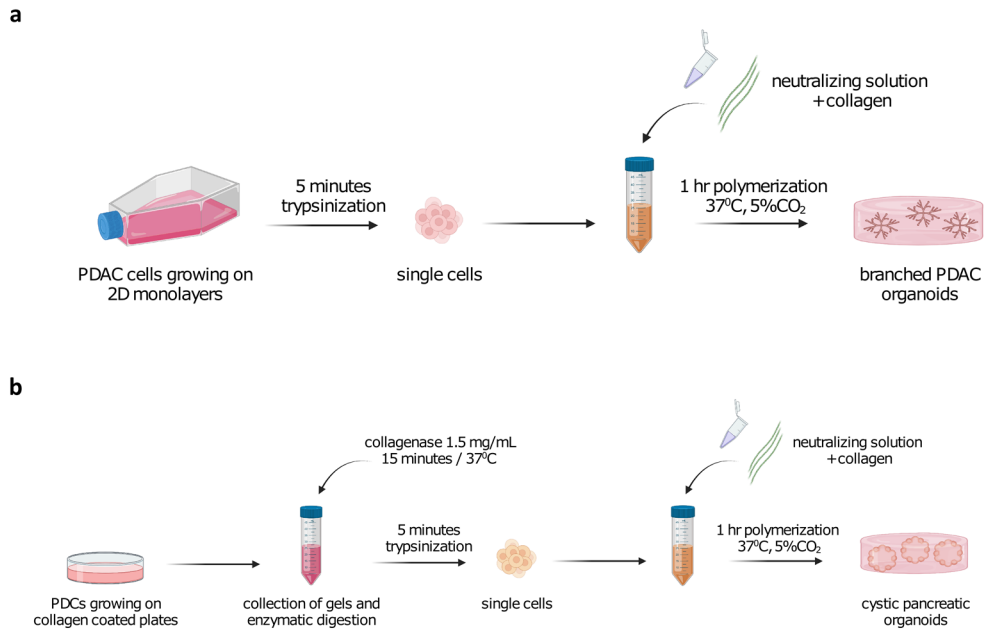

485

486 **Fig. S7. Culture procedures for PDAC cells and pancreatic ductal cells.**

487 **(a)** Schematic representation of the PDAC culture procedure.

488 **(b)** Schematic representation of the pancreatic ductal cells (PDC) culture procedure.

489 These figures were created with BioRender.com

490

491

| <b>PDC Medium composition</b> | <b>Final Concentration</b> | <b>Manufacturer</b>     | <b>Cat. Number</b> |
|-------------------------------|----------------------------|-------------------------|--------------------|
| DMEM-F12                      | NA                         | ThermoFisher Scientific | 31330-038          |
| D-Glucose                     | 5mg/mL                     | Sigma Aldrich           | G8270              |
| ITS premix                    | 0.5%                       | Corning                 | 354350             |
| Dexamethasone                 | 1 $\mu$ M                  | Sigma Aldrich           | D1756              |
| Cholera toxin                 | 100 ng/mL                  | Sigma Aldrich           | C8052              |
| Penicillin/Streptomycin       | 1x                         | ThermoFisher Scientific | 15140-122          |
| Nu Serum                      | 5%                         | Corning                 | 355500             |
| Bovine Pituitary Extract      | 25 $\mu$ g/mL              | ThermoFisher Scientific | 13028-014          |
| Primocin                      | 100 $\mu$ g/mL             | InvivoGen               | Ant-pm-1           |
| EGF                           | 20ng EGF                   | R&D systems             | 2028-EG            |
| Nicotinamide                  | 10 mM                      | Sigma Aldrich           | N3376              |

492 **Table S1.** PDC medium composition

| Epitope [Clone]               | Conjugation | Host                     | Catalogue number | Supplier                    | Dilution |
|-------------------------------|-------------|--------------------------|------------------|-----------------------------|----------|
| Phalloidin                    | Atto-647    |                          | 65906            | Sigma                       | 1:250    |
| E-cadherin<br>[24E10]         | Alexa-488   | rabbit mAb<br>(24E10)    | 3199             | Cell Signaling              | 1:50     |
| N-cadherin<br>[13A9]          | -           | mouse mAb<br>(13A9)      | 14215            | Cell Signaling              | 1:100    |
| Krt19                         | -           | rat                      | Troma III        | DSHB                        | 1:100    |
| Ki67                          | -           | rabbit pAb               | ab15580          | Abcam                       | 1:300    |
| $\alpha$ 6 Integrin<br>[GOH3] | -           | rat mAb<br>(GOH3)        | Sc-19622         | Santa Cruz<br>Biotechnology | 1:150    |
| Laminin                       | -           | rabbit pAb               | L9393            | Sigma                       | 1:100    |
| ZO-1 [ZO1-1A12]               | Alexa-594   | mouse mAb                | 339194           | Invitrogen                  | 1:100    |
| $\alpha$ SMA [1A4 (asm-1)]    | -           | mouse mAb                | MA5-11547        | Thermo Fisher<br>Scientific | 1:100    |
| Caspase 3                     | -           | rabbit pAb               | 9662             | Cell Signaling              | 1:100    |
| Cytokeratin 7                 | -           | rabbit mAb<br>(EPR17078) | ab181598         | Abcam                       | 1:100    |

495 **Table S2.** List of primary antibodies used

| <b>Host/Isotype</b> | <b>Species reactivity</b> | <b>Conjugation</b> | <b>Catalogue number</b> | <b>Supplier</b>          | <b>Dilution</b> |
|---------------------|---------------------------|--------------------|-------------------------|--------------------------|-----------------|
| Goat                | Rat                       | Alexa 594          | A11007                  | Thermo Fisher Scientific | 1:250           |
| Donkey              | Rabbit                    | Alexa 546          | A10040                  | Thermo Fisher Scientific | 1:250           |
| Goat                | Mouse                     | Alexa 546          | A11030                  | Thermo Fisher Scientific | 1:250           |
| Goat                | Rabbit                    | Alexa 488          | A11034                  | Thermo Fisher Scientific | 1:250           |

497 **Table S3.** List of secondary antibodies used

498

499 **References**

- 500 1. Ranft, J. *et al.* Fluidization of tissues by cell division and apoptosis. *Proc. Natl. Acad. Sci.* **107**, 20863–  
501 20868 (2010).
- 502 2. Montel, F. *et al.* Stress clamp experiments on multicellular tumor spheroids. *Phys. Rev. Lett.* **107**, 1–4  
503 (2011).
- 504 3. Delarue, M. *et al.* Compressive Stress Inhibits Proliferation in Tumor Spheroids through a Volume  
505 Limitation. *Biophys. J.* **107**, 1821–1828 (2014).
- 506 4. Delarue, M. *et al.* Self-driven jamming in growing microbial populations. *Nat. Phys.* **12**, 762–766  
507 (2016).
- 508 5. Streichan, S. J., Hoerner, C. R., Schneidt, T., Holzer, D. & Hufnagel, L. Spatial constraints control cell  
509 proliferation in tissues. *Proc. Natl. Acad. Sci.* **111**, 5586–5591 (2014).
- 510 6. Shraiman, B. I. Mechanical feedback as a possible regulator of tissue growth. *Proc. Natl. Acad. Sci. U. S.*  
511 *A.* **102**, 3318–3323 (2005).
- 512 7. Basan, M., Risler, T., Joanny, J. F., Sastre-Garau, X. & Prost, J. Homeostatic competition drives tumor  
513 growth and metastasis nucleation. *HFSP J.* **3**, 265–272 (2009).
- 514 8. Hannezo, E. *et al.* A Unifying Theory of Branching Morphogenesis. *Cell* **171**, 242-255.e27 (2017).
- 515 9. Hannezo, E. & Simons, B. D. Multiscale dynamics of branching morphogenesis. *Curr. Opin. Cell Biol.*  
516 **60**, 99–105 (2019).
- 517 10. Clément, R., Douady, S. & Mauroy, B. Branching geometry induced by lung self-regulated growth.  
518 *Phys. Biol.* **9**, (2012).
- 519 11. Reichert, M. *et al.* Isolation, culture and genetic manipulation of mouse pancreatic ductal cells. *Nat.*  
520 *Protoc.* **8**, 1354–1365 (2013).

521
