# Supplementary material for: Spatiotemporal dynamics of self-organized branching in pancreas-derived organoids
Source: PubMed Central journal article supplement (PMC9445099; doi:10.1038/s41467-022-32806-y), 2022-09-05
Supplement: 41467_2022_32806_MOESM3_ESM.pdf [file 41467_2022_32806_MOESM3_ESM.pdf]

## Description of Additional Supplementary Files

### **Movie S1.**

3D reconstruction of a PDAC organoid staining against DAPI (blue) and Cytokeratin 7 (red) at day 13, imaged via confocal microscopy.

### **Movie S2.**

Development of a PDAC organoid in collagen at the Onset phase, day 4- 5. Left: nuclei stained with SiRDNA, right: bright field. Both channels are summed slice projections of confocal stacks. Time-lapse imaging consists of an image taken every 15 minutes and is displayed at 20fps. Time (hh:mm:ss).

### **Movie S3.**

Development of a PDAC organoid in collagen at the Extension phase, day 7-8. Left: nuclei stained with SiRDNA, right: bright field. Both channels are maximum projections of confocal stacks. Time-lapse imaging consists of an image taken every 13 minutes and is displayed at 20fps. Time (hh:mm:ss).

### **Movie S4.**

Development of a PDAC organoid in collagen at the Thickening phase, day 11-13. Left: nuclei stained with SiRDNA, right: bright field. Both channels are maximum projections of confocal stacks. Time-lapse imaging consists of an image taken every 25 minutes and is displayed at 20fps. Time (hh:mm:ss).

### **Movie S5.**

Development of a PDAC organoid in collagen at the Lumen formation phase, day 11-12. Left: nuclei stained with SiRDNA, right: bright field. Both channels are maximum projections of confocal stacks. Timelapse imaging consists of an image taken every 10 minutes and is displayed at 20fps. Time (hh:mm:ss).

### **Movie S6.**

Extrusion process at the Lumen formation phase, day 11-12. Bright field confocal slice. Time-lapse imaging consists of an image taken every 10 minutes and is displayed at 10fps. Time (hh:mm).

### **Movie S7.**

Microlumen nucleation and fusion at the Lumen formation phase, day 12- 13. Bright field confocal slice. Timelapse imaging consists of an image taken every 10 minutes and is displayed at 10fps. Time (hh:mm).

### **Movie S8.**

Deformation field at the Onset phase, day 4-5. Bright field confocal maximum projection of 10 slices, zstep=4.99  $\mu\text{m}$ . Time-lapse imaging consists of an image taken every 10 minutes and is displayed at 30fps. Time (hh:mm).

### **Movie S9.**

Deformation field at the Extension and Thickening phase, day 7-9. The switch between deformation pattern is observable around 26h15m of imaging. Bright field confocal maximum projection of 2 slices, zstep=4.99  $\mu\text{m}$ . Time-lapse imaging consists of an image taken every 15 minutes and is displayed at 50fps. Time (hh:mm).

#### **Movie S10.**

Deformation field at the postThickening phase, day 13-14. Bright field confocal maximum projection of 195 slices, z-step=4.99  $\mu\text{m}$ . Timelapse imaging consists of an image taken every 15 minutes and is displayed at 20fps. Time (hh:mm:ss).

#### **Movie S11.**

Thickening and retracting branch leaving behind a plastically deformed collagen path, day 11-13. Bright field confocal slice. Timelapse imaging consists of an image taken every 25 minutes and is displayed at 20fps. Time (hh:mm:ss).

#### **Movie S12.**

Batimastat treatment inhibits extension. Batimastat added at 10  $\mu\text{M}$  from day 7 to 10. Left: nuclei stained with SiRDNA, right: bright field. Both channels are maximum projections of confocal stacks. Timelapse imaging consists of an image taken every 20 minutes and is displayed at 20fps. Time (hh:mm:ss).

#### **Movie S13.**

Aphidicolin treatment prevents proper extension. Aphidicolin added at 2  $\mu\text{g}$  per mL from day 7 to 9. Left: nuclei stained with SiRDNA, right: bright field. Both channels are maximum projections of confocal stacks. Time-lapse imaging consists of an image taken every 20 minutes and is displayed at 20fps. Time (hh:mm:ss).

#### **Movie S14.**

Confocal stacks 3D reconstruction of collagen fibres, visualized with reflection microscopy, on a Day 8 organoid, treated with Triton-X 100 and fixed in paraformaldehyde. Sequentially: at a branching point, around an extending branch, at the tip of a thin branch.

#### **Movie S15.**

Confocal stacks 3D reconstruction of collagen fibres, visualized with reflection microscopy, on a Day 11 organoid, treated with Triton-X 100 and fixed in paraformaldehyde. Sequentially: at the tip of thickening branch, around a tubular-like structure at a tip end, around an organoid core.
